# Supplementary material
Source: Springer Nature journal article supplement (https://www.springermedizin.de/resource/supplementary/12885_2013_4468_MOESM3_ESM.pdf/9466462)
Supplement: MOESM3 [file 9466462]

# First primary cancer

## Second primary cancer

Head and neck (C00-C14, C30-C32)

Bladder (C67)

Lung (C33-34)

Colorectal (C18-20)

Female breast (C50)

Prostate (C61)

Bladder (C67)

Stomach (C16)

Melanoma (C43)

Oesophagus (C15)

Ovary (C56)

Head and neck (C00-C14, C30-C32)

Corpus uteri (C54)

Kidney (C64)

Pancreas (C25)

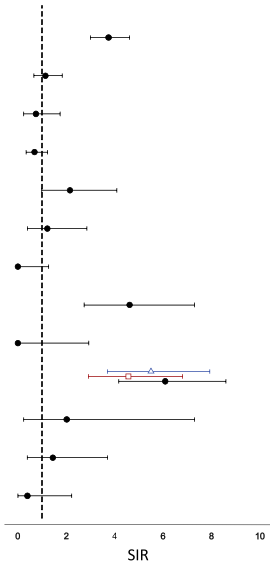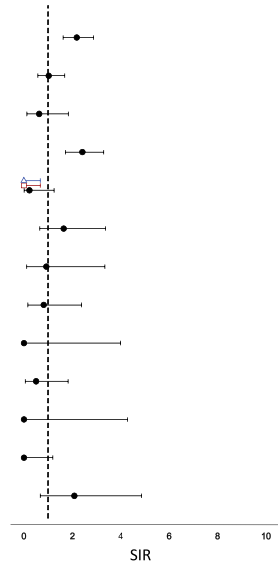

△ SEER rules

□ IARC/IACR rules
